# Supplementary material
Source: PubMed Central journal article supplement (PMC6126441)

Supplemental Table 1. *Ex vivo* biodistribution (24 h p.i.) of male nude mice bearing 22Rv1 (low PSCA) and 22Rv1-PSCA (high PSCA) xenografts. Values are depicted as Mean  $\pm$  SD, n=3.

|                   | <sup>124</sup> I-A2cDb |       | <sup>124</sup> I-A2cDb-800 |      |
|-------------------|------------------------|-------|----------------------------|------|
|                   | %ID/g                  | SD    | %ID/g                      | SD   |
| <b>Blood</b>      | 0.12                   | 0.01  | 0.12                       | 0.04 |
| <b>22Rv1-PSCA</b> | 1.12                   | 0.24  | 1.02                       | 0.47 |
| <b>22Rv1</b>      | 0.36                   | 0.13  | 0.28                       | 0.05 |
| <b>Heart</b>      | 0.05                   | 0.004 | 0.06                       | 0.01 |
| <b>Lung</b>       | 0.10                   | 0.01  | 0.09                       | 0.03 |
| <b>Liver</b>      | 0.04                   | 0.01  | 0.07                       | 0.02 |
| <b>Kidney</b>     | 0.16                   | 0.02  | 0.17                       | 0.05 |
| <b>Spleen</b>     | 0.06                   | 0.001 | 0.08                       | 0.03 |
| <b>Stomach</b>    | 0.13                   | 0.03  | 0.11                       | 0.03 |
| <b>Intestine</b>  | 0.02                   | 0.003 | 0.03                       | 0.01 |
| <b>Muscle</b>     | 0.01                   | 0.001 | 0.01                       | 0.01 |
| <b>Carcass</b>    | 0.03                   | 0.002 | 0.04                       | 0.01 |

Supplemental Table 2. *Ex vivo* biodistribution (24 h p.i.) of male NSG mice bearing patient derived xenografts (PDAC-PDX XRW6). Values are depicted as Mean  $\pm$  SD, n=7.

|                 | <sup>124</sup> I-A2cDb |      |
|-----------------|------------------------|------|
|                 | %ID/g                  | SD   |
| <b>Blood</b>    | 0.10                   | 0.01 |
| <b>PDX XRW6</b> | 0.85                   | 0.17 |
| <b>Heart</b>    | 0.04                   | 0.01 |
| <b>Lung</b>     | 0.09                   | 0.02 |
| <b>Liver</b>    | 0.04                   | 0.01 |
| <b>Kidney</b>   | 0.08                   | 0.04 |
| <b>Spleen</b>   | 0.09                   | 0.03 |
| <b>Stomach</b>  | 0.24                   | 0.11 |

|                  | <sup>124</sup> I-A2cDb |       |
|------------------|------------------------|-------|
| <b>Intestine</b> | 0.03                   | 0.01  |
| <b>Muscle</b>    | 0.01                   | 0.003 |
| <b>Carcass</b>   | 0.03                   | 0.01  |

Supplemental Table 3. *Ex vivo* biodistribution (24 h p.i.) of male NSG mice bearing patient derived xenografts (PDAC-PDX XRW6 p+3). Values are depicted as Mean ± SD, n=3.

|                  | <sup>124</sup> I-A2cDb |       | <sup>124</sup> I-A2cDb-800 |       |
|------------------|------------------------|-------|----------------------------|-------|
|                  | %ID/g                  | SD    | %ID/g                      | SD    |
| <b>Blood</b>     | 0.06                   | 0.01  | 0.13                       | 0.01  |
| <b>PDX XRW6</b>  | 0.15                   | 0.004 | 0.16                       | 0.02  |
| <b>Heart</b>     | 0.02                   | 0.004 | 0.03                       | 0.01  |
| <b>Lung</b>      | 0.05                   | 0.01  | 0.08                       | 0.01  |
| <b>Liver</b>     | 0.03                   | 0.001 | 0.20                       | 0.01  |
| <b>Kidney</b>    | 0.05                   | 0.01  | 0.17                       | 0.01  |
| <b>Spleen</b>    | 0.07                   | 0.01  | 0.25                       | 0.08  |
| <b>Stomach</b>   | 0.05                   | 0.01  | 0.09                       | 0.01  |
| <b>Intestine</b> | 0.01                   | 0.001 | 0.04                       | 0.01  |
| <b>Muscle</b>    | 0.003                  | 0.001 | 0.005                      | 0.002 |
| <b>Carcass</b>   | 0.01                   | 0.001 | 0.02                       | 0.01  |

Supplemental Figure 1. *Ex vivo* near-infrared fluorescence imaging 24 h p.i. of  $^{124}\text{I}$ -A2cDb or  $^{124}\text{I}$ -A2cDb-800. Organs of mice injected with  $^{124}\text{I}$ -A2cDb show the expected autofluorescence in stomach, liver, intestines and spleen. In mice injected with the dual-modality probe  $^{124}\text{I}$ -A2cDb-800, fluorescence signal is seen in the xenograft. Clearance of the tracer results in increased fluorescence signal in kidneys and slightly elevated signal in the liver.

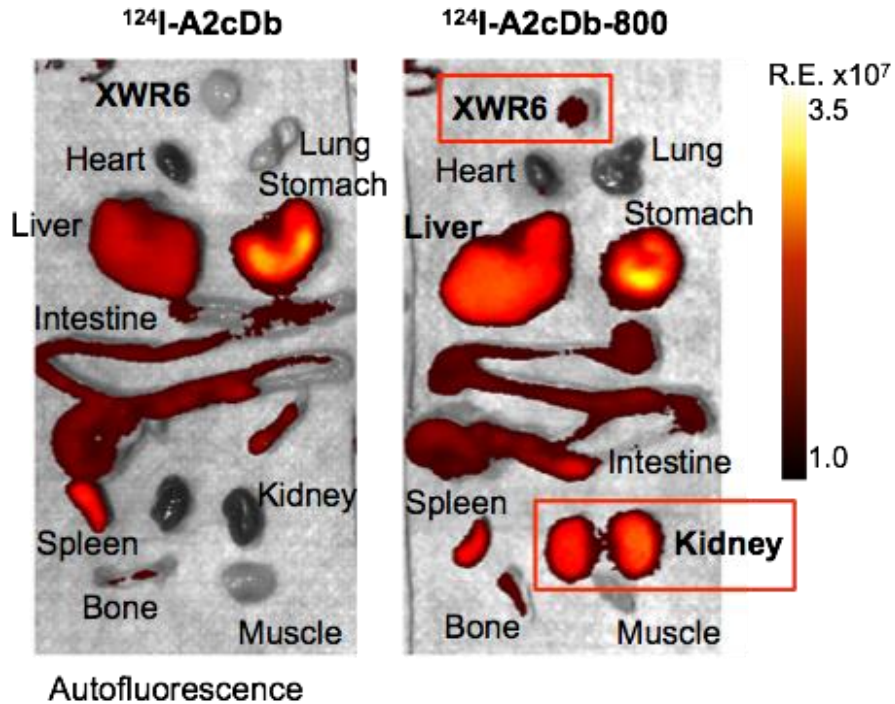

Supplement: jnm207332SupplementalData.pdf [file jnm207332SupplementalData.pdf]
